# Supplementary material for: Computational thermostability engineering of a nitrile hydratase using synergetic energy and correlated configuration for redesigning enzymes (SECURE) strategy
Source: Royal Society of Chemistry journal article supplement (doi:10.1039/d3cy01102j), 2023-01-01
Supplement: d3cy01102j1.pdf [file d3cy01102j1.pdf]

## Supplementary Information

### Computational thermostability engineering of a nitrile hydratase using Synergetic Energy and Correlated-configuration for Redesigning Enzyme (SECURE) Strategy

Jinling Xu<sup>1</sup>, Haisheng Zhou<sup>2</sup>, Jiaqi Xu<sup>2\*</sup>, Ziyuan Wang<sup>1</sup>, Zhonglang Yu<sup>1</sup>, Zhe Wang<sup>1</sup>, Hongyu Zhang<sup>1,2</sup>, Haoran Yu<sup>1,2</sup>, Jianping Wu<sup>1,2</sup>, Lirong Yang<sup>1,2\*</sup>

<sup>1</sup> *Institute of Bioengineering, College of Chemical and Biological Engineering, Zhejiang University, Hangzhou, 310027, China.*

<sup>2</sup> *ZJU-Hangzhou Global Scientific and Technological Innovation Centre, NO.733 Jianshe 3<sup>rd</sup> Road, Xiaoshan District, Hangzhou, Zhejiang, 311200, China.*

\* **Corresponding author:** E-mail of Jiaqi Xu: biojqxu@zju.edu.cn, E-mail of Lirong Yang: lryang@zju.edu.cn

## Additional tables

**Table S1. NHase library.**

| Entry | NHase | Organism                                           | Accession ID   |
|-------|-------|----------------------------------------------------|----------------|
| 1     | NHAB  | <i>Bordetella petrii</i> strain DSM12804           | AM902716.1     |
| 2     | NHAK  | <i>Klebsiella oxytoca</i> KCTC1686                 | AEX05823.1     |
| 3     | NHAP  | <i>Pseudomonas putida</i> P38K                     | U89363.2       |
| 4     | NHAC  | <i>Comamonas testosteroni</i> strain 5-MGAM-4D     | AY743666.1     |
| 5     | NHPT  | <i>Pseudonocardia thermophila</i> JCM3095          | IIRE           |
| 6     | NHCTA | <i>Caldakalibacillus thermarum</i>                 | WP_007502644   |
| 7     | NHAM  | <i>Aurantimonas manganoxydans</i> strain S185-9A1  | KP236110.1     |
| 8     | NHNO  | <i>Nocardia</i> sp.                                | AY168347.1     |
| 9     | NHJL  | <i>Rhodococcus rhodochrous</i>                     | X64360.1       |
| 10    | NHJH  | <i>Rhodococcus rhodochrous</i>                     | D67027.1       |
| 11    | NHTH  | <i>Rhodococcus ruber</i> TH3                       | RQM32616.1     |
| 12    | M33   | <i>Rhodococcus rhodochrous</i> M33                 | DI030052.1     |
| 13    | NHRP  | <i>Ruegeria pomeroyi</i> DSS-3                     | CP000031.2     |
| 14    | NHBO  | <i>Bradyrhizobium oligotrophicum</i> S58           | AP012603.1     |
| 15    | NHPAT | <i>Parageobacillus thermoglucosidasius</i>         | WP_125010986.1 |
| 16    | NHPAA | <i>Paenibacillus abyssi</i> strain CGMCC 1.12987   | WP_188529557.1 |
| 17    | NHTM  | <i>Thermoactinomyces</i> sp. CICC 10522            | WP_198064934.1 |
| 18    | NHAD  | <i>Aneurinibacillus danicus</i> strain NBRC 102444 | WP_146809496.1 |
| 19    | NHGT  | <i>Geobacillus thermoleovorans</i>                 | WP_081130963.1 |

**Table S2. Unreasonable destabilizing mutations with presumed reason for elimination.**

| Mutations                                                                                                                                                                                                                                                                                                    | Presumed reason for elimination                                                      |
|--------------------------------------------------------------------------------------------------------------------------------------------------------------------------------------------------------------------------------------------------------------------------------------------------------------|--------------------------------------------------------------------------------------|
| <ul style="list-style-type: none"> <li>● <math>\alpha</math>-subunit: M43L; V92R;</li> <li>● <math>\beta</math>-subunit: A10Q, G27A, P38L, I61A, T67S, I76L, S119P, K135R;</li> </ul>                                                                                                                        | Mutations with unfavorable mutation energy: $\Delta\Delta G > 0$                     |
| <ul style="list-style-type: none"> <li>● <math>\alpha</math>-subunit: F110V, N157W, Y184W;</li> <li>● <math>\beta</math>-subunit: G94R, K99L, G112W, K123P, D163V;</li> </ul>                                                                                                                                | Mutations would destruct the secondary structure or break the molecular interactions |
| <ul style="list-style-type: none"> <li>● <math>\alpha</math>-subunit: Y14H, L23A, K53E, V54W, L100V, T201V;</li> <li>● <math>\beta</math>-subunit: V33A, T102K, T102P, H180N, I206V, V208I, D212E</li> </ul>                                                                                                 | Mutations located in most rigid region: the lowest $R_i$                             |
| <ul style="list-style-type: none"> <li>● <math>\alpha</math>-subunit: A45L/R, V46L/I, V47I, Q48E, N79D, G83A, A105D, T156D, K158V;</li> <li>● <math>\beta</math>-subunit: G66S/A, T67P, L86I, T93Q, A96Q/G, L113F, S115A, A120C, L139R, V144A, T159V, V160I, V184L, S191A, Q197E, S200A/G, S201F;</li> </ul> | Mutations had poor correlation with active center: $-0.1 < c_{ij} < 0.1$             |
| <ul style="list-style-type: none"> <li>● <math>\alpha</math>-subunit: A179P;</li> <li>● <math>\beta</math>-subunit: S75G;</li> </ul>                                                                                                                                                                         | Similar mutations were chosen for experimental verification.                         |

**Table S3. Specific activity of pure enzyme.**

| Mutants   | Specific activity (U/mg protein) |
|-----------|----------------------------------|
| Wild type | 1510±72                          |
| A6M       | 1753±46                          |
| B4M       | 1773±182                         |
| A6M/B4M   | 1697±92                          |

**Table S4. Product tolerance of cells.**

| Mutants   | Residual activity (%) |
|-----------|-----------------------|
| Wild type | 0                     |
| A6M/B4M   | 38.4                  |

**Table S5. The parameters set using FIREPROT.**

| Parameter setting        | Input                   |
|--------------------------|-------------------------|
| Source                   | Construct new alignment |
| Blast E-value            | $1 * 10^{-10}$          |
| Minimal identity (%)     | 30                      |
| Max. number of sequences | 200                     |
| Maximal identity (%)     | 90                      |

**Table S6. The parameters set using PROSS.**

| Parameter setting         | Input  |
|---------------------------|--------|
| PDB chain                 | A/B    |
| Small-molecule ligands    | No     |
| Interacting chains        | B/A    |
| Minimal sequence identity | 35     |
| Coverage                  | 75     |
| Maximum targets           | 3000   |
| E-value                   | 0.0001 |

**Table S7. Sequences of Primers.**

| Primers  | Sequence (5' to 3')              |
|----------|----------------------------------|
| A-S30T-F | TTGGAGaccCTGCTCGTCGAGAAAGGTTTGGT |
| A-S30T-R | ACGAGCAGggtCTCCAAGGCCTTACCCGCAG  |
| A-A71D-F | TGGACCCGgacTACAAGGCGCGCTTGCTGGCG |
| A-A71D-R | CTTGTAgtcCGGGTCCACCCAGGCCTTGGCAA |
| A-A74D-F | ATACAAGgacCGCTTGCTGGCGAATGGCAGCG |
| A-A74D-R | GCAAGCGgtcCTTGTATGCCGGGTCCACCCAG |
| A-A78R-F | CTTGCTGcgcAATGGCAGCGCTGGCATTGCCG |
| A-A78R-R | TGCCATTgcgCAGCAAGCGCGCCTTGTATGCC |
| A-S81T-F | AATGGCaccGCTGGCATTGCCGAAGTGGGCTT |
| A-S81T-R | ATGCCAGCggtGCCATTCGCCAGCAAGCGCGC |

A-D96H-F GGGAGAAcacACAGTCATTCTGGAAAACACCCC  
A-D96H-R TGACTGTgtgTTCTCCCTGCACTCCAGAGAAG  
A-T97M-F GGAGAAGACatgGTCATTCTGGAAAACACCCCC  
A-T97M-R ATGACcatGTCTTCTCCCTGCACTCCAGAGAA  
A-S122V-F TACCCATGGCCGgtgCTGGGCTTGCCGCCGGCC  
A-S122V-R AGcacCGGCCATGGGTAGCAAGAGCACAGGGT  
A-A132S-F TACAAGtcgGCACCCTACCGGTGCGCATGGT  
A-A132S-R TAGGGTGCcgaCTTGTACCAGGCCGGCGGCAA  
A-A133P-F TACAAGGCCccgCCCTACCGGTGCGCATGGT  
A-A133P-R TAGGGcggGGCCTTGTACCAGGCCGGCGGCAA  
A-T165S-F GACtcgACAGCCGAATTGCGCTACATGGTGCT  
A-T165S-R AATTCGGCTGTcgaGTCCCAGACGCGGATTTCC  
A-T166S-F GACACCtcgGCCGAATTGCGCTACATGGTGCT  
A-T166S-R AATTCGGCcgaggGTGTCCCAGACGCGGATTTCC  
A-A167S-F CACCACAtcgGAATTGCGCTACATGGTGCTGC  
A-A167S-R GCAATTCcgaTGTGGTGTCCCAGACGCGGATT  
A-A179E-F gaaGGAACCGAAGGCTACAGCGAAGAACAACCT  
A-A179E-R TAGCCTTCGGTTCCttcGGGCCTTTCCGGCAGCAC  
A-Q188E-F GAAGAAgaaCTGGCCGAACCTCGTCACCCGCGA  
A-Q188E-R TCGGCCAGttcTTCTTCGCTGTAGCCTTCGGT  
B-T7L-F ACGGCATTACGACctgGGCGGAGCACATGGTTATGG  
B-T7L-R cagGTCGTGAATGCCGTTTCATGATGATCTCCT  
B-Y13F-F ATGGTtttGGCCCGTTTTACAGGGAGCCGAAT  
B-Y13F-R AACCGGGCCaaaACCATGTGCTCCGCCAGTGT  
B-V16I-F CGGAGCACATGGTTATGGCCCGATCTACAGGGAGC  
B-V16I-R GGCTCATTCGGCTCCCTGTAGATCGGGCCATAACC  
B-N21D-F GGCCCGGTTTTACAGGGAGCCGGACGAGCCCATCCT  
B-N21D-R CGCCATGAAGGATGGGCTCGTCCGGCTCCCTGTAA  
B-L25F-F AATGAGCCCATCTCCATGGCGAGTGGGAGGGTCG  
B-L25F-R CAGGACCCGACCCTCCCACTCGCCATGGAAGATGG  
B-G27Y-F CCTTCATtacGAGTGGGAGGGTTCGGGTCTCGG  
B-G27Y-R CCCACTCgtaATGAAGGATGGGCTCATTCGGC  
B-G54A-F ACATCGATGAGTTTCGACACGCAATCGAGCGCATG  
B-G54A-R ATGGGGTTCATGCGCTCGATTGCGTGTGAAACTC  
B-I55R-F TTTGACACGGCcggaGAGCGCATGAACCCCATCG  
B-I55R-R TCtcgGCCGTGTCGAAACTCATCGATGTTGAA  
B-N59P-F ATGccgCCCATCGACTACCTGAAGGGAACCTA  
B-N59P-R TAGTCGATGGGcggCATGCGCTCGATGCCGTG  
B-S75A-F GGATCCATgcaATCGAAACCTTGCTGGTTCGAA

|           |                                     |
|-----------|-------------------------------------|
| B-S75A-R  | TTCGATtgcATGGATCCAGTGTTTCGTAGTAGGTT |
| B-G112A-F | GACgcaCTGCTCAGTAACGGAGCTTCTGCCGC    |
| B-G112A-R | TTACTGAGCAGtgcGTCCACCATGACCGGCGT    |
| B-Q127P-F | AAGGAGGGGGTGccgGCGCGGTTTCGCTGTGGGC  |
| B-Q127P-R | GCcggCACCCCTCCTTGCGGGCGGCAGAAGC     |
| B-A128P-F | TGCAGccgCGGTTTCGCTGTGGGCGACAAGGTT   |
| B-A128P-R | AGCGAACCgCGGCTGCACCCCTCCTTGCGGG     |
| B-T169F-F | TGGTGTGTTTCGTGttcCCGGACACCGCGGCACAC |
| B-T169F-R | GgaaCACGAACACACCATGGTTCGATGACCACT   |
| B-T172Y-F | tacGCGGCACACGGAAAGGGCGAGCACCCCA     |
| B-T172Y-R | TTCCGTGTGCCGcgtGTCCGGCGTCACGAACACA  |
| B-A173N-F | ACCaacGCACACGGAAAGGGCGAGCACCCCA     |
| B-A173N-R | TTCCGTGTGCgttGGTGTCCGGCGTCACGAA     |

---

## Additional figures

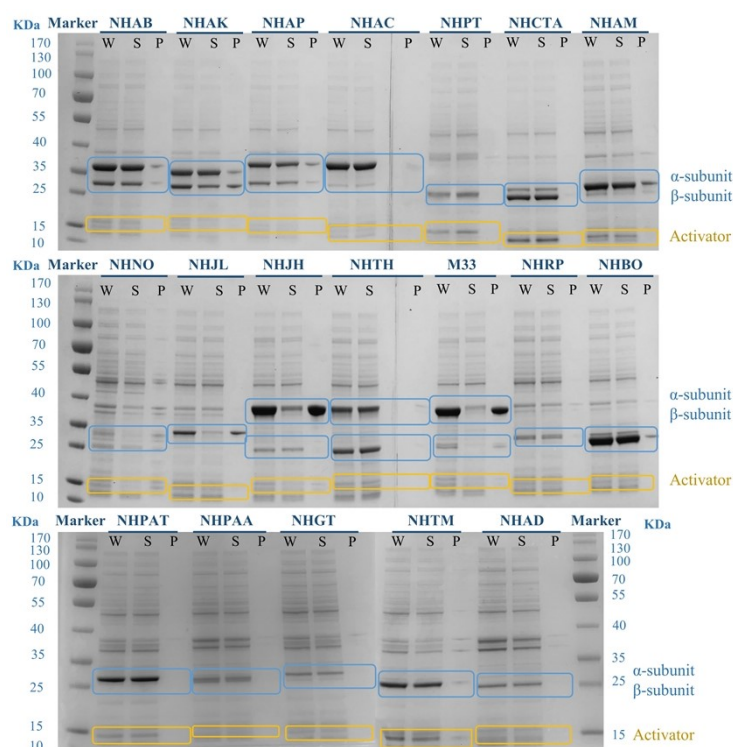

**Figure S1. SDS-PAGE analysis of the protein expression of the NHases from library.** W: whole cell; S: supernate; P: precipitate. The blue box represented the  $\alpha$  and  $\beta$  subunits and the yellow box represents the activator. Some of the  $\alpha$  and  $\beta$  subunits of NHase were overlapped on the SDS-PAGE due to the similar protein size.

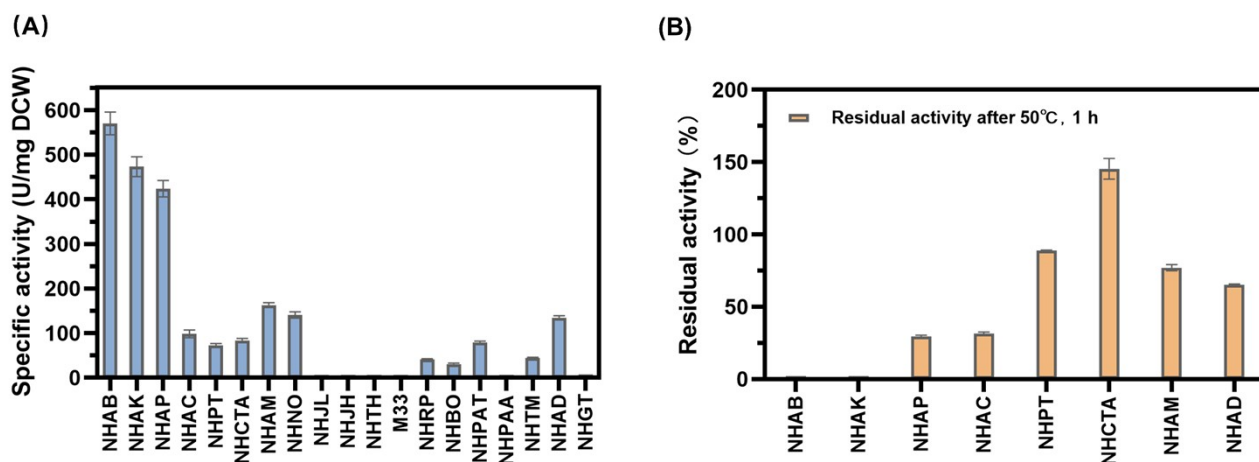

**Figure S2. Enzyme activity detection of the NHase library toward acrylonitrile.** (A) Initial crude enzyme activity of NHase with acrylonitrile as substrate. (B) Thermostability of NHase with relative high catalytic activity in the library. The residual activity was characterized after 1 h heat treatment at 50°C.

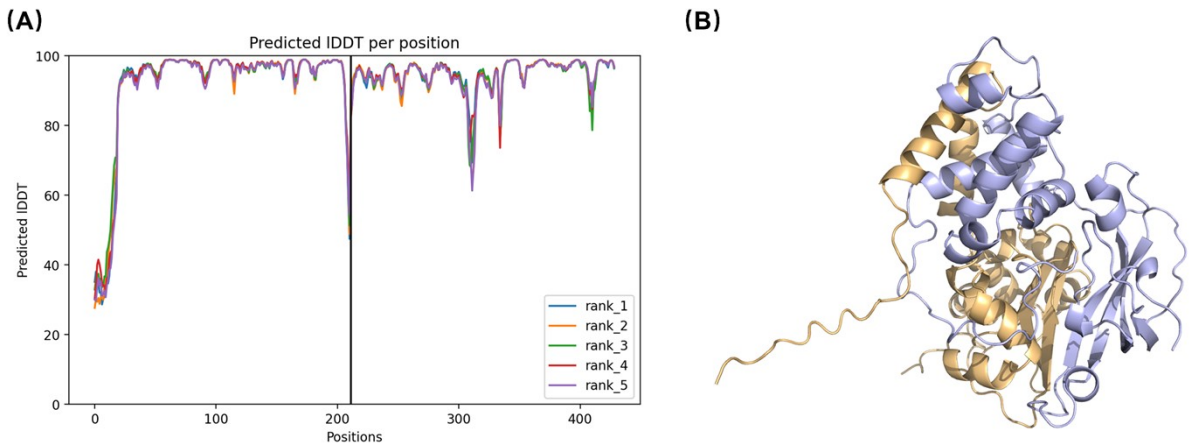

**Figure S3.** (A) The score result of modeling by AlphaFold2. (B) Protein structure with high reliability of NHAB for modification.  $\alpha$ -subunit was painted in yellow while  $\beta$ -subunit was in lightblue.

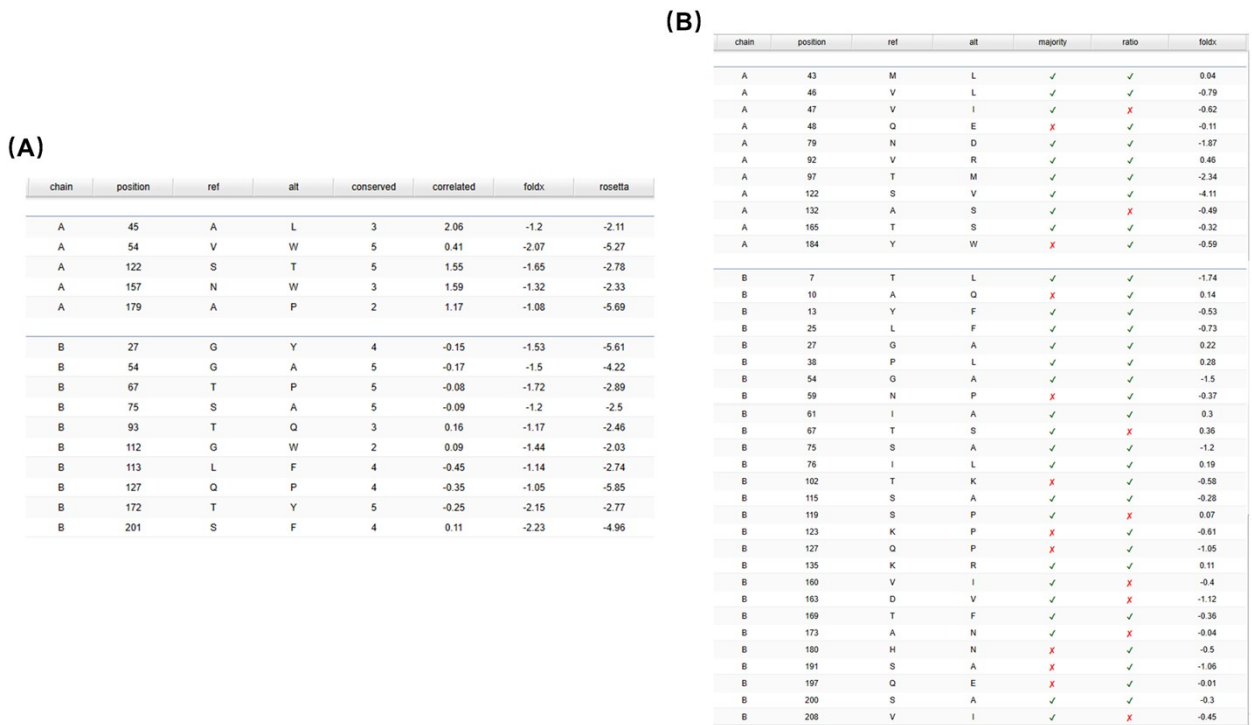

**Figure S4.** Mutations and relevant data given by FireProt. (A) Energy mutants. (B) Evolution mutants.

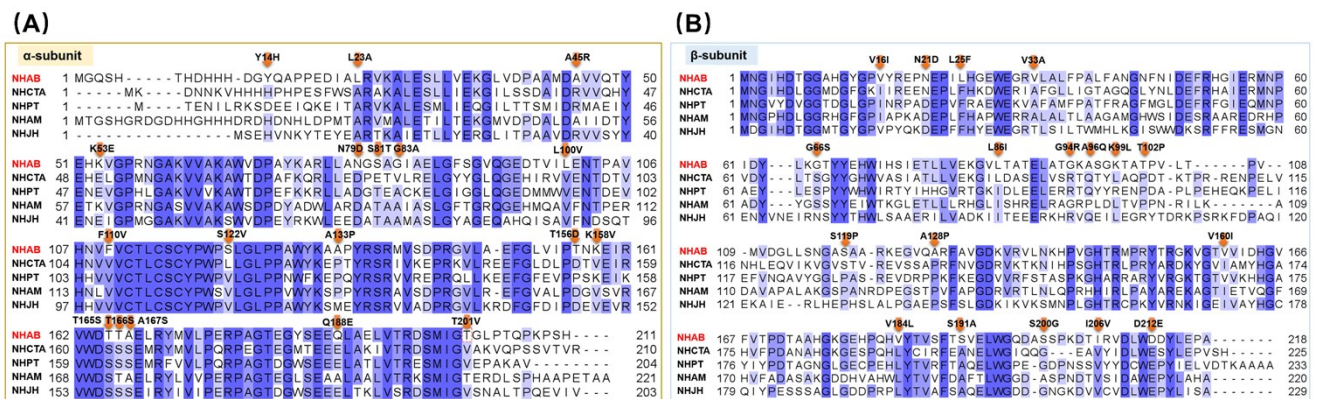

**Figure S5.** Consensus alignment using Clustal Omega. (A)  $\alpha$ -subunit. (B)  $\beta$ -subunit.



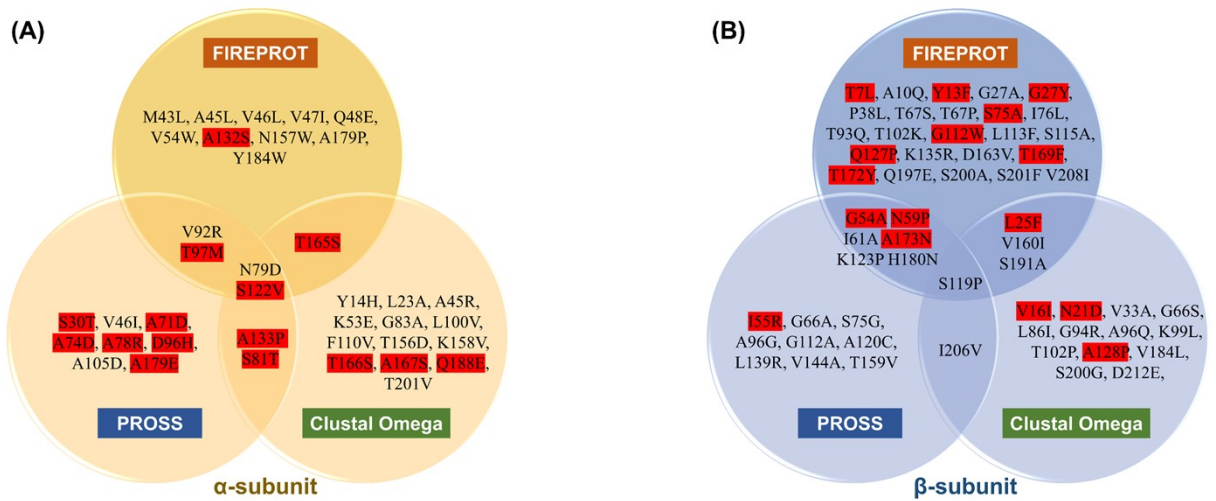

**Figure S6. Construction of mutant library. (A) α-subunit. (B) β-subunit.** Mutations selected for experimental verification were colored in red.

**(A)**

| α-subunit | A45      | V46      | V47     | Q48      | N79      | G83      | A105    | T156     | K158    |
|-----------|----------|----------|---------|----------|----------|----------|---------|----------|---------|
| α-Cys112  | -0.06583 | -0.05111 | 0.00844 | 0.00405  | 0.02241  | -0.00569 | 0.04528 | 0.02050  | 0.03044 |
| α-CSD115  | -0.02677 | 0.03090  | 0.05215 | -0.00957 | 0.00155  | -0.06699 | 0.01670 | 0.03625  | 0.04322 |
| α-Ser116  | -0.02950 | -0.00090 | 0.07239 | 0.02841  | -0.02969 | -0.04394 | 0.02544 | 0.00064  | 0.02570 |
| α-CEA117  | -0.02806 | 0.00080  | 0.03834 | 0.02843  | -0.01259 | -0.04257 | 0.01001 | -0.03601 | 0.00921 |

| β-subunit | G66      | T67      | L86      | T93      | A96      | L113    | S115    | A120     | L139     | V144     | T159     | V160     | V184     | S191     | Q197    | S200     | S201     |
|-----------|----------|----------|----------|----------|----------|---------|---------|----------|----------|----------|----------|----------|----------|----------|---------|----------|----------|
| α-Cys112  | -0.00612 | -0.01217 | -0.06066 | -0.06129 | -0.02646 | 0.01287 | 0.0634  | 0.02678  | -0.04049 | -0.00769 | 0.01151  | 0.04025  | -0.01101 | 0.07317  | 0.05930 | -0.06195 | 0.07948  |
| α-CSD115  | 0.06845  | 0.06684  | -0.02212 | -0.05468 | -0.02924 | 0.04370 | 0.01845 | -0.05495 | -0.0199  | 0.01728  | -0.02159 | 0.00946  | -0.08496 | 0.05955  | 0.06093 | -0.06255 | 0.03015  |
| α-Ser116  | 0.04259  | 0.03971  | -0.05694 | -0.05824 | -0.05893 | 0.04122 | 0.08417 | 0.01423  | -0.07564 | 0.04088  | -0.05355 | -0.02956 | -0.09885 | -0.02697 | 0.03041 | -0.04459 | 0.00085  |
| α-CEA117  | 0.08172  | 0.05264  | -0.09024 | -0.04500 | -0.06110 | 0.03177 | 0.07608 | 0.08414  | -0.0992  | -0.00111 | -0.08466 | -0.05459 | -0.03058 | -0.07429 | 0.02779 | -0.04589 | -0.03212 |

**(B)**

| α-subunit | S30      | A71      | A74      | A78      | S81     | D96     | T97     | S122    | A132    | A133    | T165    | T166    | A167    | A179     | Q188     |
|-----------|----------|----------|----------|----------|---------|---------|---------|---------|---------|---------|---------|---------|---------|----------|----------|
| α-Cys112  | -0.16390 | -0.08897 | -0.07444 | 0.00872  | 0.08160 | 0.16220 | 0.13979 | 0.15741 | 0.28763 | 0.36687 | 0.54627 | 0.44892 | 0.28405 | -0.11474 | -0.10781 |
| α-CSD115  | -0.16242 | -0.13354 | -0.12337 | -0.12727 | 0.01357 | 0.10586 | 0.07118 | 0.25451 | 0.28844 | 0.41310 | 0.22994 | 0.21975 | 0.08440 | -0.10799 | -0.11061 |
| α-Ser116  | -0.16912 | -0.10439 | -0.09800 | -0.02834 | 0.13212 | 0.14054 | 0.09856 | 0.27339 | 0.40366 | 0.40758 | 0.25464 | 0.23753 | 0.15347 | -0.11743 | -0.07369 |
| α-CEA117  | -0.17831 | -0.08484 | -0.09474 | -0.11415 | 0.10780 | 0.15977 | 0.11919 | 0.31778 | 0.42892 | 0.32456 | 0.36769 | 0.30621 | 0.23379 | -0.12272 | -0.04892 |

| β-subunit | T7      | Y13     | V16     | N21     | L25     | G27     | G54     | I55      | N59     | S75     | G112     | Q127     | A128     | T169    | T172    | A173     |
|-----------|---------|---------|---------|---------|---------|---------|---------|----------|---------|---------|----------|----------|----------|---------|---------|----------|
| α-Cys112  | 0.28954 | 0.18801 | 0.15241 | 0.10294 | 0.09108 | 0.06352 | 0.08667 | -0.00668 | 0.08529 | 0.10004 | -0.10602 | -0.10030 | -0.10623 | 0.07844 | 0.05320 | 0.11235  |
| α-CSD115  | 0.37943 | 0.24788 | 0.21210 | 0.13876 | 0.12893 | 0.09182 | 0.20991 | 0.12732  | 0.19130 | 0.19252 | -0.14210 | -0.14382 | -0.16129 | 0.10262 | 0.20517 | -0.00508 |
| α-Ser116  | 0.26702 | 0.15674 | 0.19556 | 0.14888 | 0.17118 | 0.13625 | 0.13491 | 0.11247  | 0.15554 | 0.15418 | -0.13857 | -0.16397 | -0.18081 | 0.09636 | 0.13651 | -0.09854 |
| α-CEA117  | 0.25377 | 0.11518 | 0.17754 | 0.14245 | 0.13996 | 0.10618 | 0.07194 | 0.05782  | 0.09025 | 0.11366 | -0.08592 | -0.09738 | -0.09852 | 0.08180 | 0.12550 | -0.11020 |

**Figure S7. cij (dynamics correlation coefficient) with catalytic residue (α-Cys112, α-CSD115, α-Ser116, α-CEA117). (A) cij of mutation site discarded. (B) cij of mutation sites selected for experimental determination.**



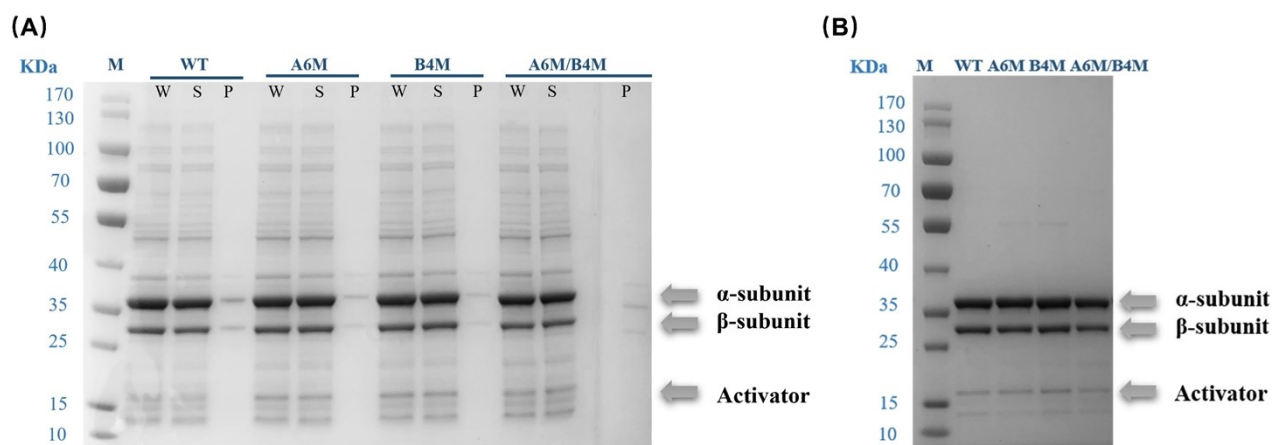

**Figure S8. SDS-PAGE analysis of the protein expression of the wild-type NHAB and mutants. (A)** Crude extract. M:marker, W: whole cell; S: supernate; P: precipitate. **(B)** Prue enzyme. M:marker, W: whole cell; S: supernate; P: precipitate.

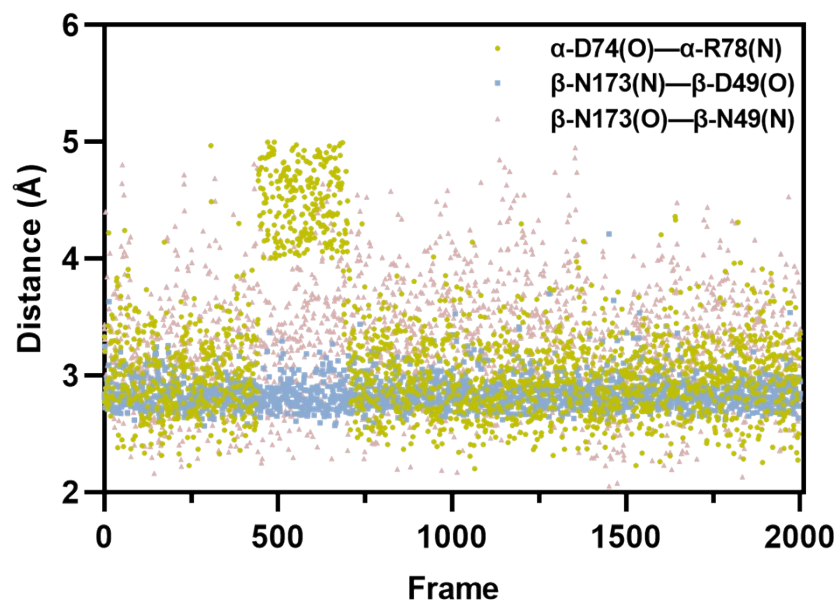

**Figure S9. The distance distribution of bonded atoms in A6M/B4M analysed by MD simulation.**

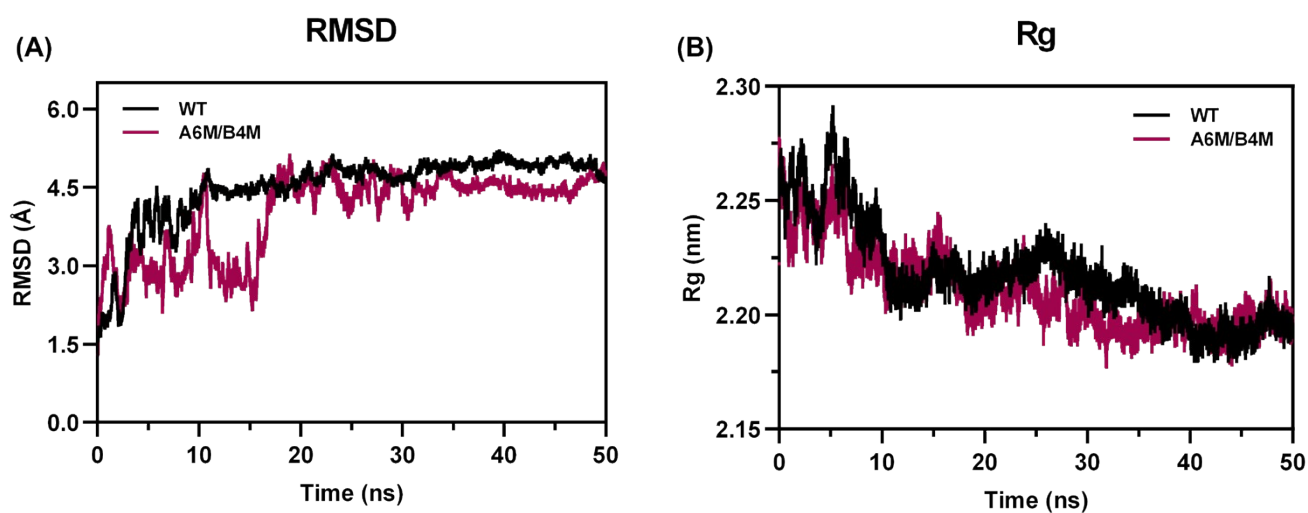

**Figure S10.** (A) RMSD values during the 50 ns simulation. (B) Rg values during the 50 ns simulation.

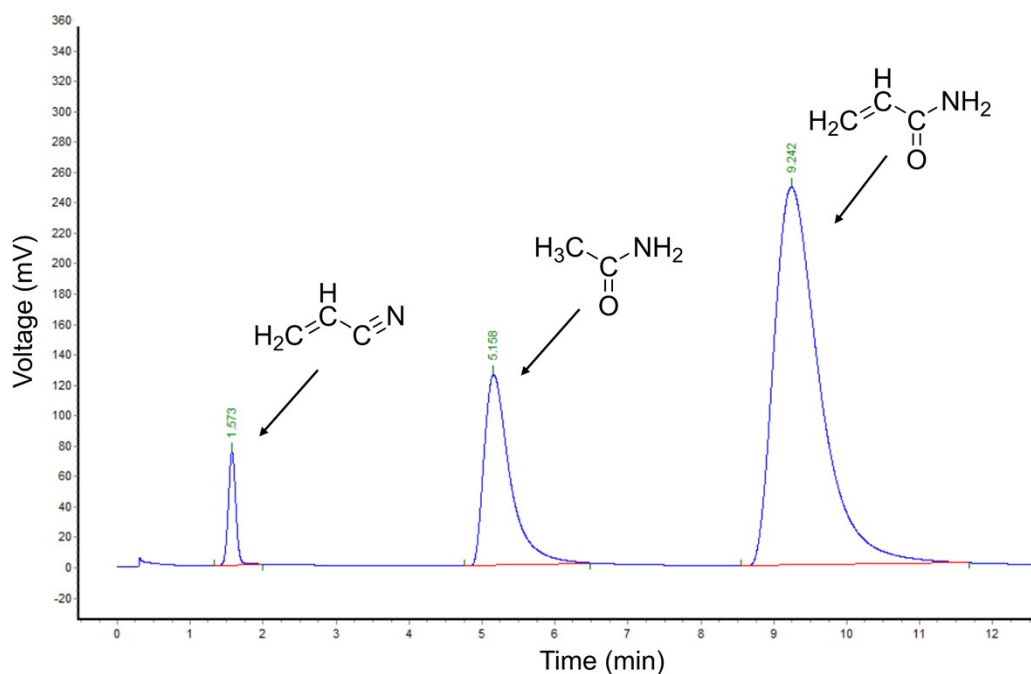

**Figure S11.** Gas chromatography (GC) analysis of the reactant and product. Acrylonitrile (1.573 min), Acetamide (5.158 min) and Acrylamide (9.242 min).
